## Molecular basis for two stereoselective Diels-Alderases that produce decalin skeletons

Keisuke Fujiyama<sup>1,11</sup>, Naoki Kato<sup>2,3,11\*</sup>, Suyong Re<sup>4,5</sup>, Kiyomi Kinugasa<sup>2</sup>, Kohei Watanabe<sup>6</sup>, Ryo Takita<sup>6</sup>, Toshihiko Nogawa<sup>7</sup>, Tomoya Hino<sup>1,10</sup>, Hiroyuki Osada<sup>7</sup>, Yuji Sugita<sup>4,8,9</sup>, Shunji Takahashi<sup>2\*</sup>, and Shingo Nagano<sup>1,10\*</sup>

<sup>1</sup>Department of Chemistry and Biotechnology, Graduate School of Engineering, Tottori University, Tottori, Japan.

<sup>2</sup>Natural Product Biosynthesis Research Unit, RIKEN Center for Sustainable Research Science, Wako, Japan.

<sup>3</sup>Faculty of Agriculture, Setsunan University, Hirakata, Japan.

<sup>4</sup>Laboratory for Biomolecular Function Simulation, RIKEN Center for Biosystems Dynamics Research, Kobe, Japan.

<sup>5</sup>Center for Drug Design Research, National Institutes of Biomedical Innovation, Health, and Nutrition, Ibaraki, Japan.

<sup>6</sup>Graduate School of Pharmaceutical Sciences, The University of Tokyo, Tokyo, Japan.

<sup>7</sup>Chemical Biology Research Group, RIKEN Center for Sustainable Research Science, Wako, Japan.

<sup>8</sup>Theoretical Molecular Science Laboratory, RIKEN Cluster for Pioneering Research, Wako, Japan.

<sup>9</sup>Computational Biophysics Research Team, RIKEN Center for Computational Science, Kobe, Japan.

<sup>10</sup>Centre for Research on Green Sustainable Chemistry, Tottori University, Tottori, Japan.

<sup>11</sup>These authors contributed equally to this work.

\*To whom correspondence should be addressed:

naoki.kato@setsunan.ac.jp; shunjitaka@riken.jp; snagano@tottori-u.ac.jp

## 1 **Summary**

2

3 Molecular chirality, discovered by Louis Pasteur in the middle of the 19th century<sup>1</sup>, is found  
4 in most primary and secondary metabolites. Particularly, the so-called natural products are  
5 rich in chiral centres<sup>2</sup>. The stereochemistry of natural products is strictly recognized in living  
6 organisms, and is thus closely related to their biological functions. The Diels–Alder (DA)  
7 reaction, which forms a six-membered ring with up to four chiral centres, is a fundamental  
8 practical reaction for C–C bond formation in synthetic chemistry<sup>3</sup>. Nature has also adopted  
9 this reaction to elaborate the complex structures of natural products using enzymes derived  
10 from various progenitor proteins<sup>4–7</sup>. Although enzymes catalysing the DA reaction, Diels–  
11 Alderases (DAases), have attracted increasing attention, little is known about the molecular  
12 mechanism by which they control the stereochemistry and perform catalysis. Here, we solved  
13 the X-ray crystal structures of a pair of decalin synthases, Fsa2 and Phm7, that catalyse  
14 intramolecular DA reactions to form enantiomeric decalin scaffolds during biosynthesis of the  
15 HIV-1 integrase inhibitor equisetin and its stereochemical opposite, phomasetin<sup>8,9</sup>. Based on  
16 the crystal structures, docking simulations followed by all-atom molecular dynamics  
17 simulations provided dynamic binding models demonstrating the folding of linear polyenoyl  
18 tetramic acid substrates in the binding pocket of these enzymes, explaining the  
19 stereoselectivity in the construction of decalin scaffolds. Site-directed mutagenesis studies  
20 verified the binding models and, in combination with density functional theory calculations,  
21 clarified how hydrophilic amino acid residues in the Phm7 pocket regulate and catalyse the  
22 stereoselective DA reaction. This study highlights the distinct molecular mechanisms of the  
23 enzymatic DA reaction and its stereoselectivity *experimentally* and *computationally*. We  
24 anticipate that clarified molecular mechanism herein provides not only the basic  
25 understanding how these important enzymes work but also the guiding principle to create  
26 artificial enzymes that produce designer bioactive molecules.

27

## 1 Introduction

2 Enzymes that create complex carbon frameworks with multiple chiral centres, such as  
3 polyketide synthase (PKS) and terpene cyclase, are gaining increasing attention not only in  
4 natural product chemistry but also in the chemical industry<sup>10-13</sup>. Enzymes catalysing the  
5 Diels–Alder (DA) reactions ([4+2] cycloadditions), the so-called Diels–Alderases (DAases),  
6 form two C–C bonds and up to four chiral centres to generate a cyclohexene from a  
7 conjugated diene and substituted alkene; these enzymes play key roles in controlling  
8 stereochemistry during the formation of polycyclic structures (Supplementary Fig. 1)<sup>4-7</sup>. Since  
9 the discovery of SpnF, the first monofunctional enzyme reported to catalyse a DA reaction<sup>14</sup>,  
10 many DAases have been identified in the biosynthetic pathways of bacterial, fungal, and  
11 plant origins. Unlike PKSs, nonribosomal peptide synthetases, and terpene cyclases, which  
12 share active site-containing domain structures involved in their specific functions<sup>13,15</sup>,  
13 DAases have no common structural features and are derived from distinct progenitor  
14 enzymes or proteins. SpnF, which catalyses DA reaction in the spinosyn A biosynthesis<sup>14</sup>,  
15 contains S-adenosylmethionine (SAM), and its overall structure belongs to the SAM-  
16 dependent methyltransferase family<sup>16</sup>, and the overall structures of PyrI4 and PyrE3, which  
17 are involved in the pyrroindomycin biosynthesis<sup>17</sup>, are very similar to those of lipocalin family  
18 proteins and FAD-dependent monooxygenases, respectively<sup>18,19</sup>. Although such DAases  
19 evolved independently from their own progenitors, they all exhibit high stereoselectivity and  
20 catalytic efficiency. The molecular basis of this emerging group of enzymes is gradually being  
21 revealed by genetic, biochemical and structural analyses, in combination with computational  
22 investigations<sup>20-22</sup>. However, the mechanisms underlying the remarkable features of naturally  
23 occurring DAases, such as the origin of stereoselectivity and their performance as catalysts,  
24 have remained elusive.

25 Fsa2-family decalin synthases (DSs) found in filamentous fungi<sup>8</sup> catalyse  
26 stereoselective DA reaction during the biosynthesis of decalin-containing pyrrolidin-2-ones  
27 (DPs), which exhibit various biological activities<sup>23,24</sup>; this class of molecules includes the HIV-  
28 1 integrase inhibitors equisetin (**1**) and phomasetin (**2**)<sup>25,26</sup> and the telomerase inhibitor  
29 UCS1025A<sup>27,28</sup> (Fig. 1a). Via intramolecular DA reaction, Fsa2 and its homolog Phm7 create  
30 a decalin scaffold with enantiomeric configurations from similar linear polyenoyl tetramic  
31 acids (e.g., **3** and **4**) (Fig. 1b)<sup>8,9,29</sup>. We have shown that replacement of *phm7* in a **2**-producing  
32 fungus with *fsa2* resulted in the production of a **1**-type decalin scaffold (2*S*,3*R*,8*S*,11*R*)<sup>9</sup>,  
33 indicating that these enzymes determine the stereochemistry of the decalin scaffold during  
34 DP biosynthesis. Another homologous enzyme, MycB<sup>30</sup>, also produces a **1**-type decalin  
35 scaffold, and the **2**-type decalin scaffold is produced by CghA<sup>31</sup> and UcsH<sup>32</sup>, which are  
36 involved in the biosynthesis of Sch 210972 and UCS1025A, respectively. Interestingly, but

1 not surprisingly, another decalin scaffold (*2R,3S,8S,11R*) is produced by PvhB, which is  
2 involved in the varicidin A biosynthesis<sup>33</sup> (Fig. 1a). Thus, structural comparisons of the DSs  
3 that differ in function, i.e., stereochemical output, provide insight into the mechanisms of the  
4 stereoselective DA reactions.

5 In this study, we revealed the molecular basis of two stereoselective enzymes, Fsa2 and  
6 Phm7, that catalyse DA reaction to form enantiomeric decalin scaffolds. X-ray crystal  
7 structures of substrate-free Fsa2 and Phm7, and Phm7 bound to an inhibitor (hereafter  
8 referred to as inhibitor-bound Phm7), were determined at 2.17, 1.62, and 1.61-Å resolution,  
9 respectively. The substrate-bound poses were modelled using docking simulations followed  
10 by all-atom molecular dynamics (MD) simulations. We employed the generalized replica-  
11 exchange with solute tempering (gREST) method<sup>34</sup>, which allows extensive sampling of  
12 possible binding poses of the substrates<sup>35,36</sup>. Site-directed mutagenesis studies were  
13 performed to verify the binding models for stereoselective synthesis and examine the amino  
14 acid residues involved in substrate interactions. Density functional theory (DFT) calculations  
15 were performed to reveal the reaction mechanism in detail, particularly the stereoselectivity  
16 and rate acceleration by Phm7. This powerful combination of experimental methods and  
17 calculations, which we used to investigate two enzymes that produce enantiomeric decalin  
18 scaffolds, provides insight into the molecular mechanism of enzyme-mediated DA reaction  
19 and its stereoselectivity.

20

## 21 **Results**

### 22 **Structure analyses of Fsa2, Phm7, and inhibitor-bound Phm7**

23 The crystal structure of Fsa2, which produces the *2S,3R,8S,11R* decalin scaffold found  
24 in equisetin (**1**, Fig. 1a,b, see Supplementary Fig. 2 for compound structures used in this  
25 study), has a  $\beta$ -sandwich and a  $\beta$ -barrel domain at the N- and C-termini, respectively (Fig.  
26 2a). The structures of both domains exhibit structural similarity with those of lipocalin family  
27 proteins that bind heme, steroids, and other hydrophobic ligands in the pocket located in their  
28  $\beta$  structures<sup>37</sup>. Interestingly, however, Fsa2 does not have a pocket in either the N- or C-  
29 domains (Supplementary Fig. 3). Instead, a large pocket is present between the two domains.  
30 Considering the likely substrate structure and volume, we speculate that the large cavity  
31 created by the two domains is an active- and substrate-binding site. Phm7 catalyses  
32 intramolecular DA reaction to produce the enantiomeric decalin scaffold (Fig. 1b). Despite  
33 their distinct stereoselectivity and low sequence similarity (36 % sequence identity), the  
34 crystal structure of Phm7 is similar to that of Fsa2 (RMSD = 0.849 Å), and the shape and  
35 volume of their large pockets are also similar (Fig. 2b).

36 To probe the active site of the DSs, we performed Phm7 ligand screening using

1 microscale thermophoresis (MST)<sup>38</sup> (Supplementary Fig. 4). We found that 3-aminomethyl-  
2 *p*-menthane (**5**), which was similar to the phomasetin (**2**) substructure, dose-dependently  
3 inhibited Phm7 activity *in vitro* and production of **2** in the fungus *Pyrenochaetopsis* sp. RK10-  
4 F058 (Supplementary Fig. 5). Compound **5** also inhibited equisetin (**1**) production in the  
5 fungus *Fusarium* sp. FN080326 (Supplementary Fig. 6). We next performed co-crystallization  
6 of Phm7 and **5** and obtained the crystal structure of the inhibitor-bound Phm7 at 1.61-Å  
7 resolution (Supplementary Fig. 7). The inhibitor was located on the lower side of the pocket  
8 and formed hydrophobic interactions with Y178, W223, F226, L245, and L381. The amino  
9 group of **5** was surrounded by Y68, E51, and Y178. Because **5** can bind to both Phm7 and  
10 Fsa2 to inhibit their functions (Supplementary Figs. 4–6), the lower side of the pocket  
11 between the two domains would form the active site of these enzymes. Indeed, CghA,  
12 exhibiting the same stereoselectivity as Phm7 (Fig.1a)<sup>31</sup>, was recently reported to have two  
13 β domains, as in Phm7 and Fsa2<sup>39</sup>. The product binding site is almost the same as the **5**-  
14 binding site of Phm7.

15

#### 16 **Docking and MD simulations for binding pose determination**

17 To determine whether the pocket would be large enough to accommodate the substrates,  
18 substrate **4** was docked into the crystal structure of the inhibitor-bound form of Phm7 using  
19 AutoDock Vina. Substrate **4** fits within the pocket in various binding poses, including a folded  
20 form in which a U-shaped folded alkyl chain including asymmetric C6 of **4** was located at the  
21 lower side of the pocket where **5** can bind, and the tetramic acid and polyene moieties were  
22 extended into the inner upper part of the pocket (Supplementary Fig. 8a). Likewise, folded  
23 substrate **3** fits within the pocket of Fsa2 (Supplementary Fig. 8b). These docking simulations  
24 using the crystal structures indicated that the pocket between the N- and C-domains of Phm7  
25 and Fsa2 has enough room for binding of the folded substrates.

26 To explore the binding poses of the substrates and their dynamics in the pockets, we  
27 carried out all-atom MD simulations using the gREST method<sup>34</sup>, which extensively samples  
28 possible binding poses otherwise elusive in conventional simulations. A variety of poses were  
29 obtained (see Supplementary Movies S1 and S2 for collected binding poses of Phm7 and  
30 Fsa2, respectively), and clustering analysis of the simulation trajectories resulted in four  
31 major bound poses, including “folded” and “extended” conformations, for both **4** and **3**  
32 (Supplementary Fig. 9). In Fig. 3a, the major cluster of Phm7 (63% of Phm7, pA in  
33 Supplementary Fig. 9a) shows a well-defined bound pose for **4**. In this cluster, the tetramic  
34 acid moiety and polyene tail of the folded poses were located at the upper front and back of  
35 the pocket, respectively, whereas the U-shaped part was found at the lower side of the pocket.  
36 Similar tetramic acid–front and polyene–back poses were also found in the folded

1 conformations in Fsa2 (33% of Fsa2, fA in Supplementary Fig. 9b), although bound **3**  
2 fluctuated in the pocket to a greater extent than in Phm7 (Fig. 3b). In both Phm7 and Fsa2,  
3 the electrostatic potential inside the pocket had a large negative value as it moved deeper  
4 into the pocket (Supplementary Fig. 10). The bottom surface of the pocket was significantly  
5 hydrophobic, whereas the hydrophilic surface was found in the upper wall of the pocket  
6 (Supplementary Fig. 11). These inhomogeneous electrostatic, hydrophobic, and hydrophilic  
7 environments of the pocket coincide with the common tetramic acid–front and polyene–back  
8 orientation.

9 The representative folded conformation of the major cluster of Phm7, which dominates  
10 the cluster (Supplementary Fig. 12a), explains the configuration of the stereoselective DA  
11 reaction product with the 2*R*,3*S*,8*R*,11*S* decalin scaffold (Fig. 3c). In contrast to Phm7, the  
12 pocket of Fsa2 allows various “folded” conformations of **3** (Supplementary Fig. 12b).  
13 Nevertheless, a certain number of poses are consistent with the configuration of the **1**-type  
14 (2*S*,3*R*,8*S*,11*R*) decalin scaffold (Fig. 3c). Comparison of the carbon chain conformation (C–  
15 C–C–C dihedral angles) between substrates **3** and **4** revealed that the diene and dienophile  
16 moieties exhibit pseudo-enantiomeric conformations, consistent with the stereochemical  
17 relationship of the transition state structures corresponding to decalin scaffolds of **1** and **2**  
18 (Supplementary Fig. 13). The LigPlot analysis of the representative pose of **4** shows that the  
19 tetramic acid moiety forms hydrogen bonds with the side chains of E51, N84, and K356, and  
20 with the main chain carbonyl of G64. The U-shaped part and polyene tail of the substrate fit  
21 with the hydrophobic region of the pocket lined by L49, W223, Y232, L245, F341, W342,  
22 L381, and I383 (Supplementary Fig. 14a). Similarly, the hydrophobic U-shaped part and  
23 polyene tail of **3** are surrounded by many hydrophobic side chains of Fsa2 (W45, V169, Y171,  
24 W216, Y225, and M238), and the tetramic acid moiety is hydrogen-bonded with N346  
25 (Supplementary Fig. 14b). Therefore, MD simulations based on the crystal structures of the  
26 two enzymes suggested distinct substrate–enzyme interactions and their resultant substrate  
27 poses corresponding to the enantiomeric decalin scaffolds.

28

## 29 **Functional analyses of Phm7 and Fsa2**

30 To examine the substrate–enzyme interactions predicted from the MD simulations, we  
31 first established an *in vitro* enzyme assay system using cell lysates prepared from fungal  
32 mycelia lacking the *phm7* gene<sup>9</sup>. The cell lysates were directly incubated with Phm7 or Fsa2,  
33 and their reaction products were analysed by liquid chromatography/electrospray ionization  
34 mass spectrometry (LC/ESI-MS). Linear polyenoyl tetramic acid **4** was less abundant in the  
35 presence of the enzymes, and the expected products of Phm7 and Fsa2, *N*-  
36 demethylphomasetin (**6**) and its derivative containing **1**-type *trans*-decalin (**7**), respectively,

1 were formed (Fig. 4a,b). The reaction selectivity of Phm7 and Fsa2 shown in the *in vitro*  
2 assay was consistent with that observed in the producer fungus and a mutant in which *phm7*  
3 was replaced with *fsa2*<sup>9</sup>. Furthermore, we observed no significant difference in the amount  
4 of *cis*-decalin containing derivative **8** between the presence and absence of enzyme. The  
5 time course of the *in vitro* reaction confirmed the linear formation of product **6** for the first  
6 several minutes, and no cycloaddition in the absence of enzyme under the conditions tested  
7 (Supplementary Fig. 15). These results indicated that products **6** and **7** were exclusively  
8 formed by the action of Phm7 and Fsa2, respectively, from the linear polyene substrate found  
9 in the fungal cell lysate. Therefore, the *in vitro* assay using the fungal cell lysate allowed us  
10 to evaluate the enzyme activities by measuring the products formed.

11 Using the *in vitro* assay system, we carried out site-directed mutagenesis studies of  
12 Phm7 and Fsa2 to validate the substrate binding modes predicted by the MD simulations  
13 (Supplementary Figs. 14, 16). The key amino acid residues that interact with the tetramic  
14 acid moieties (K356 in Phm7 and N346 in Fsa2), the hydrophobic U-shaped parts (W223 in  
15 Phm7 and W216 in Fsa2), and the polyene tails (W342 in Phm7 and W332 in Fsa2) were  
16 substituted with Ala, and their enzyme activities were compared with those of the wild-type  
17 enzymes. Ala substitutions of these amino acid residues significantly decreased enzyme  
18 activity *in vitro* (Fig. 4c), indicating that the pockets between the N- and C-domains of Phm7  
19 and Fsa2 were the active sites of both enzymes, and that the proposed binding modes were  
20 reliable.

21 Next, we focused on Phm7 to demonstrate the binding modes. We introduced additional  
22 single Ala substitutions into the amino acid residues close to substrate **4** (Supplementary Fig.  
23 16a,b), and performed the enzyme assay. Ala substitutions of the residues in proximity to the  
24 tetramic acid moiety of **4** (Supplementary Fig. 17) significantly decreased the enzyme activity  
25 (Fig. 4c). In particular, we observed a marked decrease in the activity of mutants harbouring  
26 substitutions in hydrophilic residues such as D53 and E82, suggesting that the hydrophilic  
27 upper wall of the pocket (Supplementary Fig. 10) was indeed responsible for trapping the  
28 tetramic acid moiety of **4**, as predicted by the MD simulations. We also expected that the  
29 hydrogen bond donations from K356 to the carbonyl oxygen at C1, as well as those of E51  
30 and N84 to the tetramic acid moiety, would activate the dienophile to accelerate the reaction.  
31 Ala substitution at Y178 and W223 also significantly decreased enzyme activity (Fig. 4c).  
32 A230, L245, and T247 are located near the substrate but do not interact directly with the  
33 substrate in the MD model. Substitution of these residues with smaller ones (L245V and  
34 T247A) yielded mutants that retained considerable activity, whereas substitution with longer  
35 and larger ones (A230F and T247F) significantly decreased activity, probably due to steric  
36 clash (Fig. 4c and Supplementary Fig. 17). These results confirmed that the **5**-binding site

1 formed by amino acid restudies such as Y178, W223, L245, and T247 is the reaction  
2 chamber in which the stereospecific DA reaction occurred.

3 To further validate the substrate–enzyme interactions in Phm7, we examined the effects  
4 of Ala substitutions of Phm7 on phomasetin (**2**) production in the producer fungus, in which  
5 the wild-type *phm7* was replaced with the mutant genes. Phm7 Y68A and W223A mutants  
6 produced significantly lower levels of **2** and suppressed production of **8** in the fungus  
7 (Supplementary Fig. 18). In addition, a new peak **9** was detected in the culture extract of the  
8 W342A mutant. Structural analyses by NMR and MS revealed that **9** was a derivative of **2**  
9 with a hydroxy group at the terminus of polyene (See Supplementary Note for structure  
10 determination of **9**, Supplementary Fig. 18). Production of **9** in this gain-of-function mutant  
11 supported the role of W342 in the interaction with the polyene tail of **4**. Taken together, our  
12 in-depth analyses of Phm7 mutants using an *in vitro* enzyme assay and *in vivo* production in  
13 fungus demonstrated that the MD simulation–based binding models were reliable, and that  
14 the predicted amino acid residues are involved in substrate binding.

#### 15 16 **DFT calculations for the molecular mechanism in the Phm7 pocket**

17 Given that Phm7 promotes the intramolecular DA reaction of substrate **4** in a  
18 stereoselective manner, the detailed molecular mechanism in this event with Phm7 is of great  
19 importance. Hence, we focused on how Phm7 determined the stereoselectivity of the DA  
20 reaction, as well as whether this enzyme can accelerate (i.e., catalyse) the reaction. MD  
21 simulations pointed out that the structure of **4** seemed to be convergent in the major folded  
22 conformations in the pocket of Phm7 (Supplementary Fig. 12a). The geometry between the  
23 dienophile and diene moieties in this “folded” structure is close to the configuration that would  
24 afford the decalin scaffold with the same configuration as Phm7 product **6** (Fig. 3c). We  
25 investigated the intrinsic stereoselectivity of the uncatalysed DA reaction of **4** using DFT  
26 calculations at the M06-2X/6–311+G\*\* (scrf = CPCM, water) level of theory (Fig. 5a). Among  
27 the four transition states to the corresponding decalin derivatives, **TS<sub>1a</sub>**, which affords **8**, is  
28 located in the lowest energy state ( $\Delta G^\ddagger + 16.1$  kcal/mol) relative to the linear conformation,  
29 whereas **TS<sub>1b</sub>**, which affords **6**, requires slightly higher activation energy ( $\Delta G^\ddagger + 16.5$  kcal/mol).  
30 The reactions that afford Fsa2-type product **7** and another *cis*-decalin derivative were found  
31 to be less feasible via **TS<sub>1c</sub>** and **TS<sub>1d</sub>**, respectively. These computational results suggested  
32 that the DA reaction without any steric bias should give a mixture of **8** and **6**, whereas **7** might  
33 also be present as a minor component. Thus, the combined experimental and theoretical  
34 results indicated that efficient folding of the substrate in the Phm7 pocket plays a pivotal role  
35 as a major determinant of stereoselectivity.

36 Next, to gain some insight into the rate acceleration mechanism, we investigated the



1 amino acid residues that interact with **4** in the Phm7 pocket. In particular, we focused on the  
2 polar amino acid residues that trap the tetramic acid moiety in the upper part of the pocket.  
3 Similar to Lewis acid coordination, efficient hydrogen bond donation to the carbonyl group  
4 adjacent to the dienophile should lower the lowest unoccupied molecular orbital (LUMO)  
5 energy of the dienophile and facilitate the DA reaction<sup>40</sup>. From this point of view, the amino  
6 moiety of K356 is a hydrogen bond donor to the corresponding carbonyl group at the C1 of  
7 folded **4** (Fig. 5b). DFT calculations at the same level of theory were performed to track the  
8 course of the DA reaction of **4** with methylamine as a model of the K356 residue. However,  
9 no significant acceleration was observed, and the activation barrier for **TS<sub>2b</sub>** was +16.6  
10 kcal/mol relative to the folded conformation. In fact, no efficient decrease in LUMO energy  
11 was observed (-0.90 eV for **TS<sub>1b</sub>** vs -0.95 eV for **TS<sub>2b</sub>**, Fig. 5a,c). Taking a closer look at the  
12 binding model, we discerned that the amino moiety of K356 makes another hydrogen bond  
13 with the carboxy group of E82 to form an ammonium architecture (Fig. 5b). We carried out  
14 DFT calculations by incorporating methylamine and acetic acid as models to reproduce the  
15 hydrogen bond network (i.e., **4**-K356-E82)<sup>22</sup>. The modelled network provides a tight hydrogen  
16 bond on the carbonyl oxygen at the C1 of **4** (1.74 Å) due to the acidified proton of the amino  
17 group. Furthermore, because the amino protons became more electron-deficient, an  
18 additional weak hydrogen bond<sup>40</sup> (2.35 Å) formed with the carbonyl oxygen at C2'. Therefore,  
19 the dihedral angle of the C1 and C2' carbonyl groups in **TS<sub>3b</sub>** (25.4°) became much smaller  
20 than that of **TS<sub>2b</sub>** (33.9°), making the conjugation between the enone dienophile and tetramic  
21 acid moiety more efficient. Thus, both electronic and structural perturbation by the hydrogen  
22 bond network decreased the LUMO energy to -1.04 eV in **TS<sub>3b</sub>**, and the DA reaction was  
23 greatly facilitated by lowering the activation barrier for **TS<sub>3b</sub>**. (+14.7 kcal/mol). These results  
24 explain the marked decrease in the enzymatic activity of the E82A mutant (Fig. 4c). In  
25 addition, the direct incorporation of the carboxy group of E82 in hydrogen bonding with **4**  
26 in the absence of K356, which was also reproduced by the DFT calculation model  
27 (Supplementary Fig. 19), could explain why the Ala substitution of K356 did not cause a  
28 complete loss of activity. Computation revealed that other hydrogen bonds between the  
29 tetramic acid moiety and the amino acids, such as E51 and N84, did not lower the LUMO  
30 energy level (Supplementary Fig. 20), and should be devoted to the appropriate positioning  
31 of substrate **4** in the Phm7 pocket.

32 In sum, the triad of experiments, MD simulations, and DFT calculations revealed the  
33 molecular mechanism of the Phm7 pocket as the catalyst for stereoselective DA reaction.  
34 Key findings are as follows: (i) although the intrinsic selectivity of the DA reaction of **4** prefers  
35 the formation of **8** in the absence of the enzyme, the folding structure in the pocket defines  
36 the selective formation of **6**; (ii) the sophisticated hydrogen bond network derived from K356

1 and E82, namely, Brønsted acid-activated hydrogen bonding catalysis, promotes the DA  
2 reaction event very efficiently; and (iii) some polar amino acid residues guide the substrate  
3 to the opportune folding structure.

4

## 5 **Discussion**

6 Since the first report of direct evidence in biological DA reaction in solanapyrones  
7 biosynthesis and crystal structure of macrophomate synthase<sup>41,42</sup>, many DAases have been  
8 discovered, and their crystal structures have been determined.<sup>16,18,19,21,43-47</sup> Their structures  
9 tell us that these enzymes were derived from ones with distinct functions other than  
10 catalysing DA reactions, implying that their active sites were subsequently converted into  
11 those for the DA reaction. By sharp contrast, DSs do not use the ligand-binding site of  
12 lipocalin family protein as an active site for the DA reaction. Fusion of two lipocalin-family  
13 proteins generated two- $\beta$ -domain proteins with a pocket between the two domains. By  
14 burying their pockets in the  $\beta$ -domains, these proteins then acquired the ability to bind  
15 unstable linear polyenoyl tetramic acids using the relatively relaxed pocket, and eventually  
16 catalyse the DA reaction. A protein from *Nitrosomonas europaea*, NE1406, has a tertiary  
17 structure very similar to those of DSs<sup>48</sup>. This protein, which consists of two lipocalin-like  
18 domains and has several small pockets in and between the two  $\beta$ -domains (Supplementary  
19 Fig. 21), is likely to be involved in the carotenoid biosynthesis. From the standpoint of  
20 molecular evolution, nature has utilized the fusion (or duplication) of lipocalin proteins to  
21 generate new functions in a pocket between two domains.

22 Several amino acid residues are conserved among the DSs whose functions have been  
23 characterized (Supplementary Fig. 22). Many of them are located inside the molecule and  
24 likely play roles in maintaining enzyme structure rather than in catalysis per se. Among the  
25 amino acid residues lining the active site pocket, only Trp at the bottom of the pocket (W223  
26 in Phm7 and W216 in Fsa2) is highly conserved, suggesting that it plays a key role in the DA  
27 reaction. Indeed, MD simulations predicted that the W223 and W216 form hydrophobic  
28 interactions with substrates **4** and **3**, respectively (Supplementary Fig. 14c). The substitutions  
29 of the conserved Trp with Ala substantially retarded the enzyme activity for both Phm7 and  
30 Fsa2. Although the sequence homology among the DSs is limited, they seem to share amino  
31 acid distributions in the pockets between the two domains (Supplementary Fig. 23). It is likely  
32 that substrates bind to the pocket in a similar way (tetramic acid-front and polyene-back  
33 orientation), allowing stereoselective DA reactions to proceed. Considering that the substrate  
34 conformation in the enzyme pocket is correlated to the product stereochemistry, we propose  
35 a model of how DSs produce decalin scaffolds with four possible configurations via the DA  
36 reaction (Fig. 6). The conformations of **TS<sub>1b</sub>** and **TS<sub>1c</sub>** are enantiomeric to each other, except

1 for the C6 methyl group (Fig. 5a), and all the C–C–C dihedral angles of the carbon chains  
2 are opposite (Supplementary Fig. 13). This can be described as a difference in the manner  
3 of folding the linear substrate, i.e., the linear substrate **3** is folded clockwise and **4** counter-  
4 clockwise to yield (pseudo)enantiomeric conformations in the enzyme pocket (Fig. 3c). When  
5 the folded substrate **3** is flipped horizontally, it binds to the Fsa2 pocket in the tetramic acid–  
6 front and polyene–back orientation. A key difference between the transition state structures  
7 for *trans* and *cis*-decalin scaffolds is the rotation at the C7–C8 bond. Thus, the substrate  
8 conformation in the enzyme pocket can be predicted for *cis*-decalins, such as varicidin A  
9 (2*R*,3*S*,8*S*,11*R*, Fig. 1b) and even an unidentified metabolite (2*S*,3*R*,8*R*,11*S*). Recent  
10 phylogenetic analysis suggested that approximately 100 sequences are potentially involved  
11 in DP biosynthesis<sup>49</sup>. Therefore, this group of enzymes, which is widespread in Ascomycota  
12 fungi, are attractive targets for structure–function relationship studies, providing key structural  
13 features for determining the stereoselectivity of these reactions.

14 The MD simulations showed that the pockets between the N- and C-domains of DSs  
15 were large enough to accommodate the substrates in various conformations. The “folded”  
16 cluster of substrate **4** contains a dominant pose (80%) with an *s-cis* conformation at C9–C10,  
17 explaining the expected decalin configurations (Supplementary Fig. 24). The calculated C–  
18 C–C–C dihedral angles along the carbon chain of the dominant pose takes a single  
19 orientation at all the rotational bonds, and no pose corresponding to the other possible  
20 decalin configurations was observed. This indicates that the Phm7 pocket robustly regulates  
21 the conformation of the substrate to stabilize the folded pose with a specific conformation.  
22 On the contrary, substrate **3** in the Fsa2 pocket exhibits a rather large variation in folded  
23 poses (Supplementary Fig. 12b). This is likely due to the fact that Fsa2 binds a smaller  
24 substrate (the volumes of **3** and **4** are 379 Å<sup>3</sup> and 402 Å<sup>3</sup>, respectively) in a larger pocket  
25 relative to Phm7 (the pocket size is approximately 150 Å<sup>3</sup> larger than that of Phm7,  
26 Supplementary Fig. 25). In addition, unlike Phm7, which tightly holds the tetramic acid moiety  
27 by multiple hydrogen bonds, there is no hydrophilic amino acid residue in proximity to the C1  
28 carbonyl, and only N346 is involved in hydrogen bonding with **3**. Fsa2 likely retains the  
29 substrate affinity to the enzyme by accommodating various folded conformations and  
30 minimizing entropy loss upon binding. This enzyme still produces a reactive conformation for  
31 the DA reaction with a desired stereochemistry. Our preliminary analysis suggests that both  
32 of the hydrogen bonding of substrate **3** with N346 and the indole ring orientation of W216  
33 play key roles in stabilizing the reactive conformation (Supplementary Fig. 26). Further  
34 investigation on the enzymatic reaction mechanism, including activation free energies, using  
35 a hybrid quantum mechanics (QM) / molecular mechanics (MM) method, should fill in the  
36 missing piece of the catalytic mechanisms. Given the structural similarity between Phm7 and

1 Fsa2 and their opposite selectivity in the DA reaction, clarification of the detailed mechanism  
2 would be of great significance, and is the subject of ongoing research in our group.

3 In conclusion, our investigations combining experimental and theoretical approaches  
4 highlighted the distinct molecular mechanisms underlying Phm7- and Fsa2-catalysed DA  
5 reactions. The folding of substrate **4** in the Phm7 pocket and **3** in the Fsa2 pocket, predicted  
6 by the gREST method based on X-ray crystal structures, exhibited stereoselectivity in the  
7 construction of decalin scaffolds. The results of site-directed mutagenesis studies and DFT  
8 calculations clarified how the hydrophilic amino acid residues in the Phm7 pocket regulate  
9 and catalyse the stereoselective DA reaction. In addition, our results raise questions about  
10 the molecular tactics adopted by Fsa2, which should be addressed in future research: what  
11 determines the transition state from the flexible folded conformations in the pocket, and how  
12 dose Fsa2 accelerate the DA reaction without effective hydrogen bonding on the dienophile  
13 moiety?

14

## 1 **Methods**

2 **Chemicals.** All solvents and reagents were of analytical grade and purchased from  
3 commercial sources unless noted otherwise. The small molecules used in MST screening,  
4 including 3-aminomethyl-*p*-menthane (**5**), and sinefungin were purchased from Namiki Shoji  
5 and Cayman Chemical, respectively.

6  
7 **Expression of Fsa2 and Phm7 in *Escherichia coli*.** The ORFs of *fsa2* and *phm7* were  
8 amplified by PCR with the genomic DNA of *Fusarium* sp. FN080326<sup>50</sup> and *Pyrenochaetopsis*  
9 sp. RK10-F058<sup>51</sup>, respectively. The amplified decalin synthase (DS) genes were cloned into  
10 the pGEM T-easy vector (Promega) and verified by sequencing. The gene fragments were  
11 excised by NdeI–XhoI digestion and ligated to the pET28b(+) vector (Novagen), resulting in  
12 pET28b(+)-*fsa2* and -*phm7*. Due to inefficient cleavage and removal of the His-tag at the N-  
13 terminus of Fsa2, modified pET28b(+)-*fsa2* lacking a thrombin site and linker peptide was  
14 used for crystallization study. The primer pairs used for the amplification are listed in  
15 Supplementary Table 1. PCR-based site-directed mutagenesis of the DS genes was  
16 performed using the primers listed in Supplementary Table 1. Whole plasmids of the mutant  
17 DSs were amplified using pET28b(+)-*fsa2* and -*phm7* as templates, which were digested with  
18 DpnI after PCR. The amplified cyclic DNAs were introduced into *E. coli* DH5 $\alpha$ , and the  
19 mutated plasmids were verified by sequencing.

20 *E. coli* BL21 Star<sup>TM</sup> (DE3) (Invitrogen) cells were transformed with pET28b(+)-*fsa2* and  
21 -*phm7*, and then cultured in Terrific broth. Gene expression was induced by the addition of  
22 0.5 mM isopropyl- $\beta$ -D-thiogalactopyranoside, and further cultured at 30 °C for 6 h. For  
23 preparation of selenomethionine (SeMet)-substituted Phm7, *E. coli* B834(DE3) carrying  
24 pET28b(+)-*phm7* was cultured at 18 °C for 96 h using the Overnight Express Autoinduction  
25 System 2 (Novagen). Cells expressing the DS were harvested by centrifugation and frozen  
26 at –80 °C until use.

27  
28 **Purification of Fsa2 and Phm7.** The collected Fsa2 expressing cells were resuspended in  
29 buffer A (50 mM Tris-HCl, pH7.5, 200 mM NaCl, 10 % v/v glycerol) supplemented with 0.5  
30 mg/mL lysozyme and 5  $\mu$ g/mL Sm2 nuclease, and disrupted by sonication. After  
31 centrifugation at 59,800 *g* at 4 °C for 30 min, supernatants were loaded onto a Ni-NTA  
32 agarose column (Qiagen). After washing with buffer A containing 5 mM imidazole and 0.2 %  
33 v/v Tween 20, the enzyme was eluted with buffer A containing 200 mM imidazole. The eluate  
34 was 10-times diluted with buffer B1 (50 mM Tris-HCl, pH 8.0, 10 % v/v glycerol, 1 mM DTT)  
35 and loaded onto a HiTrapQ column, which was pre-equilibrated with buffer B1. The enzyme  
36 was eluted with a 0–0.5 M NaCl gradient. The concentrated fractions containing the enzyme

1 were further purified by Superdex 75 16/600 column. The buffer of the purified enzyme was  
2 substituted with buffer C (50 mM Tris-HCl, pH7.5, 200 mM NaCl, 5 mM DTT).

3 The collected Phm7 expressing cells were resuspended in buffer D (50 mM Tris-HCl  
4 pH7.5, 500 mM NaCl, 10 % v/v glycerol), and disruption and centrifugation were performed  
5 as in Fsa2. The supernatants were loaded onto a Ni-NTA agarose column and washed with  
6 buffer D containing 5 mM imidazole and 0.2% v/v Tween 20. The column was further washed  
7 with buffer D containing 30 mM imidazole, and the enzyme was eluted with buffer D  
8 containing 200 mM imidazole. The collected fractions containing the enzyme were  
9 concentrated and the His-tag was removed by thrombin digestion in a dialysis tube in buffer  
10 E (50 mM Tris-HCl, pH 7.5, 200 mM NaCl, 10 % v/v glycerol, 20 mM imidazole). Undigested  
11 enzyme and thrombin were removed using Ni-NTA and Benzamidine Sepharose 6B columns.  
12 The enzyme was further purified using resource Q and superdex75 16/600 columns.

13 The purified Fsa2 and Phm7 were concentrated to 30 and 15 mg/mL, respectively, in  
14 crystallization buffer (50 mM Tris-HCl, pH7.5, 200 mM NaCl, 5 mM DTT) using a 10 kDa cut-  
15 off Amicon Ultra-15 concentrator (Merck), and frozen at -80 °C until use. We confirmed that  
16 Fsa2 and Phm7 were monomeric states in solution using size-exclusion chromatography.

17  
18 **Phm7 ligand screening using MST assay.** To bypass the unavailability of the Phm7  
19 substrate and cofactor for structural studies, ligand screening was conducted using MST  
20 assay<sup>38</sup>. Fluorescent dye-labelled Phm7 and Fsa2 were prepared using the Monolith Protein  
21 labelling kit RED-NHS 2nd generation and Monolith His-Tag Labelling Kit RED-tris-NTA 2G,  
22 respectively. MST measurements were performed using a Monolith NT.115 instrument  
23 (NanoTemper). In brief, each compound was twofold serially diluted and mixed with equal  
24 amounts of the labelled Phm7 (20 nM in 50 mM Tris-HCl, pH 8.0, 0.15 M NaCl, 10 mM MgCl<sub>2</sub>,  
25 0.05% v/v Tween20) or Fsa2 (100 nM in 50 mM Tris-HCl, pH 8.0, 0.2 M NaCl, 0.05% v/v  
26 Tween20). After a short incubation, the compound-enzyme mixtures were loaded into glass  
27 capillaries and measured for initial fluorescence and change in fluorescence upon  
28 thermophoresis measurement. The data were analysed using the MO Affinity software.

29  
30 **Crystallization of substrate-free Phm7 and Fsa2.** Crystallization of the substrate-free  
31 forms of Phm7 and Fsa2 and SeMet-substituted Phm7 was performed by mixing 1 µL of the  
32 substrate-free enzyme solution with 1 µL of the reservoir solution using the sitting drop vapor  
33 diffusion method at 20 °C. Reservoir components for Phm7 were 0.1 M Tris-HCl, pH 7.0,  
34 1.56-1.59 M ammonium sulfate, and 15-19 % v/v glycerol. For Fsa2, reservoir solution  
35 containing 0.1 M Bis-Tris-HCl, pH 7.0, and 26-29 % w/v polyethylene glycol 3,350 was used.  
36 Initially, small Phm7 multi-crystals were obtained, and 2-6 months were required to obtain

1 large crystals suitable for data collection. Three-dimensional rhombus-shaped single crystals  
2 of Fsa2 were obtained within a week. Crystals of SeMet-substituted Phm7 were obtained by  
3 the same procedure used for the native Phm7 crystals.

4  
5 **Crystallization of inhibitor 5-bound Phm7.** 5-bound Phm7 crystals were prepared by  
6 soaking substrate-free crystals in buffer containing 20 mM Tris-HCl, pH 7.0, 50 mM NaCl, 1.6  
7 M ammonium sulfate, 10 % v/v glycerol, 10 mM **5**, 10 % v/v ethanol, and 10 % v/v dimethyl  
8 sulfoxide) for 1 h at 4 °C.

9  
10 **Data collection and structural determination of Phm7 and Fsa2.** All crystals were flash  
11 frozen in a cryo-stream at 100 K, and then the crystals were transferred into liquid nitrogen.  
12 Prior to flash freezing, Fsa2 crystals were soaked cryo-buffer A; 0.77 M Bis-Tris-HCl, pH 7.0,  
13 30 % w/v polyethylene glycol 3,350, 50 % v/v ethanol for 45 min and kept in air for 5–10 s to  
14 dehydrate. Crystals of a substrate-free and SeMet-substituted Phm7 were soaked in cryo-  
15 buffer A; 20 mM Tris-HCl, pH 7.0, 0.1 M NaCl, 2 M ammonium sulfate, 20 % v/v glycerol for  
16 a few minutes, and crystals of **5**-bound Phm7 were soaked in cryo-buffer B; 50 mM Tris-HCl,  
17 pH 7.0, 2 M ammonium sulfate, 20 % v/v glycerol, 2.5 mM **5**, 2.5 % v/v dimethyl sulfoxide,  
18 7.5 % v/v ethanol for a few minutes.

19 X-ray diffraction data were collected at SPring-8 beamlines BL26B1, BL32XU, BL41XU  
20 (Hyogo, Japan), or a Photon Factory beamline BL1A (Ibaraki, Japan). The collected data  
21 were integrated and reduced using the XDS package<sup>52</sup>, or AIMLESS<sup>53</sup> in the CCP4 package.

22 Single-wavelength anomalous diffraction datasets of SeMet-substituted Phm7 crystals  
23 were collected at the wavelength of the absorption peak of the selenium atom (0.97920 Å).  
24 Substructure determination, phase calculation, and auto model building were performed  
25 using Phaser SAD pipeline<sup>54</sup> in the CCP4 package. Three Phm7 molecules were found in  
26 the asymmetric unit, and a model of 841 out of 1158 residues were built. Manual model  
27 building was performed using Coot<sup>55</sup>, and Refmac<sup>56</sup> in CCP4 and PHENIX refine<sup>57</sup> were  
28 used for structure refinement. We solved the crystal structures of substrate-free Phm7, **5**-  
29 bound Phm7, and substrate-free Fsa2 by the molecular replacement method using SeMet-  
30 substituted Phm7 as a search model. The model quality was validated by MolProbity<sup>58</sup> in the  
31 PHENIX package. Ramachandran plot analysis showed that the residues of Fsa2, Phm7,  
32 and inhibitor-bound Phm7 in favoured (allowed) region were 96.59 (3.34), 97.66 (2.34), and  
33 97.91 (1.82) %, respectively. The data collection and the final refinement statistics are  
34 summarized in Supplementary Table 2. Polder maps<sup>59</sup> of **5** were calculated using PHENIX  
35 (Supplementary Fig. 27).

36

1 **Substrate docking simulation.** Structural models of polyenoyl tetramic acids **3** and **4** were  
2 built and energy minimized using Chem3D v.16.0 (Perkin Elmer). The terminal region of  
3 polyenes, which are not involved in DA reaction, was partially restrained by AutoDockTools  
4 (v.1.5.6) to maintain the planarity of the C–C double bond. All molecules in the asymmetric  
5 unit of the inhibitor-bound Phm7 and the substrate-free Fsa2 crystals were used as receptors,  
6 and hydrogen atoms were added to the receptors. Side chains of E82, W223, and K356 of  
7 Phm7 were treated as flexible entities to facilitate the calculation, and Fsa2 was treated as a  
8 rigid model. The docking simulations were performed using AutoDock Vina<sup>60</sup> under the  
9 following conditions: calculation grid boxes for Phm7 and Fsa2 were 44×52×40 Å<sup>3</sup> and  
10 34×40×38 Å<sup>3</sup>, and the exhaustiveness values were 150 and 100–200, respectively.

11  
12 **Molecular dynamics (MD) simulations.** The initial configurations of enzyme–substrate  
13 complexes, **4**•Phm7 and **3**•Fsa2, were built based on the results of precedent docking  
14 simulations. Each system was neutralized and solvated in 150 mM NaCl solution. All  
15 simulations were performed using the GENESIS program package (version 1.4.0)<sup>61,62</sup>. The  
16 AMBER ff14SB force field<sup>63</sup> was used for protein and ions, while the TIP3P model<sup>64</sup> was used  
17 for water molecules. The substrates were parameterized with the general AMBER force field  
18 parameter set version 2.1 (GAFF2) and AM1-BCC atomic charges using the antechamber  
19 module in Amber Tools 18<sup>65,66</sup>.

20  
21 **gREST simulations.** We defined the solute region as the dihedral angle and non-bonded  
22 energy (Coulomb and Lennard-Jones) terms of both the substrate and a set of selected  
23 binding site residues: D53, S66, Y68, E82, W223, W342, and K356 for Phm7 and the  
24 corresponding residues of Fsa2 (D51, G64, T66, Q80, W216, W332, and N346). Eight  
25 replicas were employed to cover the solute temperature range of 310.0–773.9 K (T = 310.0,  
26 350.8, 396.7, 452.8, 519.6, 592.3, 675.0, and 773.9 K). We applied a flat-bottom potential to  
27 avoid the substrate being away from the binding site.

28

$$U(R) = \begin{cases} K(R - R_0)^2, & R > R_0 \\ 0, & R \leq R_0 \end{cases}$$

29 where  $R$ ,  $R_0$ , and  $K$  are the distances between the centre of masses of the substrate and  
30 binding site residues in the solute region, the flat-bottom distance, and the force constant,  
31 respectively. We set  $R_0$  to 15.0 Å and  $K$  to 1 kcal/mol/Å<sup>2</sup>. The ligand feels no extra force in  
32 the region of  $R = 0$ –15 Å, while the harmonic restraint potential is applied beyond  $R = 15$  Å  
33 to avoid substrate dissociation. Each of the **4**•Phm7 and **3**•Fsa2 systems was initially relaxed  
34 at different temperatures for 1 ns followed by production runs for 100 ns per replica (total  
35 sampling of 0.8 μs = 100 ns × 8 replicas). The trajectories at 310 K were used for the analysis.



1 Additional details are provided in the Supplementary Notes.

2

3 ***In vitro* enzyme assay.** The  $\Delta phm7$  mutant derived from the **2**-producer fungus  
4 *Pyrenochaetopsis* sp. RK10-F058<sup>9</sup> was cultured at 28 °C for 3 days in CYA medium. Mycelia  
5 were collected, washed, and frozen until use. The mycelia were ground to a fine powder  
6 under liquid nitrogen, and approximately 0.1 g of mycelial powder was suspended in 650  $\mu$ L  
7 of extraction buffer (20 mM Tris-HCl, pH 7.5, 10 mM NaCl, 10 mM EDTA, 1% v/v Tween20,  
8 45  $\mu$ M tetracycline, 200  $\mu$ M sinefungin). After centrifugation at 20,000  $\times g$  at 4 °C for 5 min,  
9 the **4**-saturated supernatant was used as substrate for the enzyme assay. Tetracycline, which  
10 was used as an external standard to normalize peak area, had no effect on the enzyme assay  
11 system. Conversion from **6** to **2**, which was mediated by intrinsic methyltransferase activity  
12 in the cell lysate, was completely inhibited by 200  $\mu$ M sinefungin under the conditions tested.

13 Ten microliters of Phm7 or Fsa2 was added to 30  $\mu$ L of the substrate and incubated at  
14 25 °C. For evaluation of mutant Phm7 and Fsa2 activities, 100 ng of Phm7 and 10  $\mu$ g of Fsa2  
15 were used for the reactions, and incubated for 8 and 60 min, respectively. The enzyme  
16 reactions were terminated by adding 80  $\mu$ L of ice-cold acetonitrile, followed by rapid  
17 quenching using liquid nitrogen. The reaction mixtures were thawed, centrifuged, and  
18 analysed by LC/ESI-MS using a Waters Acquity UPLC H-Class system fitted with a mass  
19 spectrometer (QDa, Waters). Comparison with authentic standards<sup>9</sup> identified compounds  
20 corresponding to peaks **6**, **7**, and **8** as *N*-demethylphomasetin and its derivatives containing  
21 **1**-type *trans*- and *cis*-decalin, respectively (Figs. 1b, 4b). An *m/z* value of 398.2334 [M-H]<sup>-</sup>,  
22 which was same as that of **6–8**, and a characteristic UV spectrum ( $\lambda_{max}$  293, 305, 319 nm)  
23 for a tetraene substructure suggested the structure of linear pentanenoyl tetramic acid **4** as  
24 proposed, although it was too unstable to isolate and determine the structure by NMR.

25 The LC conditions were as follows: column, Waters Acquity UPLC BEH C18 (2.1  $\times$  100  
26 mm, 1.7  $\mu$ m); flow rate, 0.25 mL/min; solvent A, water containing 0.05 % v/v aqueous formic  
27 acid; solvent B, acetonitrile containing 0.05 % v/v aqueous formic acid. After injection of the  
28 samples into a column equilibrated with 5 % solvent B, the column was developed with a  
29 linear gradient from 5 % to 60 % solvent B over 1 min and 60 % to 100 % over 4 min, followed  
30 by isocratic elution of 100 % solvent B for 6 min.

31

32 **Characterization of the mutated Phm7 in the producer fungus.** The *phm7* gene on the  
33 chromosome of the **2**-producer fungus *Pyrenochaetopsis* sp. RK10-F058 was replaced with  
34 the mutated *phm7* gene under the control of a forced expression promoter ( $P_{terf1}$ ). Mutations  
35 were introduced into pBI121 containing the *ble-P<sub>terf1</sub>-phm7* cassette<sup>9</sup> by PCR-based method  
36 as described above. Primer pairs used are listed in Supplementary Table 1. The strain RK10-

1 F058 was transformed with the plasmid carrying the mutated *phm7* using *Agrobacterium*  
2 *tumefaciens*-mediated transformation, and transformants were isolated as described  
3 previously<sup>9</sup>. Correct replacements and introduced mutations were confirmed by PCR and  
4 direct sequencing. Metabolite production of the transformations carrying the mutated *phm7*  
5 was analysed by LC/MS as described previously<sup>9</sup>.

6

7 **Density functional theory (DFT) calculations.** All calculations were carried out with the  
8 Gaussian 16 (revision B.01) program package<sup>67</sup>. The molecular structures and harmonic  
9 vibrational frequencies were obtained using the hybrid density functional method based on  
10 the M06-2X functional<sup>68</sup>. We used the 6-311+G\*\* basis set<sup>69</sup>. The self-consistent reaction  
11 field (SCRF) method based on the conductor-like polarizable continuum model (CPCM)<sup>70-73</sup>  
12 was employed to evaluate the solvent reaction field (water;  $\epsilon = 78.39$ ). Geometry optimization  
13 and vibrational analysis were performed at the same level. All stationary points were  
14 optimized without any symmetry assumptions and characterized by normal coordinate  
15 analysis at the same level of theory (number of imaginary frequencies, NIMAG, 0 for minima  
16 and 1 for TSs). The intrinsic reaction coordinate (IRC) method<sup>74,75</sup> was used to track minimum  
17 energy paths from transition structures to the corresponding local minima.

18

#### 19 **Data availability**

20 Atomic coordinates and crystallographic structure factors have been deposited in the  
21 Protein Data Bank under accession codes 7E5T (Fsa2), 7E5U (Phm7), and 7E5V (inhibitor-  
22 bound Phm7). All other data are available from the corresponding author upon reasonable  
23 request.

24

#### 25 **References**

26

- 27 1. Pasteur, L. Sur les relations qui peuvent exister entre la forme cristalline, la composition  
28 chimique et le sens de la polarization rotatoire. *Annales Chimie Phys.* **24**, 442-459 (1848).
- 29 2. Clardy, J. & Walsh, C. Lessons from natural molecules. *Nature* **432**, 829-837 (2004).
- 30 3. Nicolaou, K.C., Snyder, S.A., Montagnon, T. & Vassilikogiannakis, G. The Diels--Alder  
31 reaction in total synthesis. *Angew Chem Int Ed Engl* **41**, 1668-98 (2002).
- 32 4. Minami, A. & Oikawa, H. Recent advances of Diels-Alderases involved in natural product  
33 biosynthesis. *J Antibiot* **69**, 500-506 (2016).
- 34 5. Jeon, B.S., Wang, S.A., Ruzsyczky, M.W. & Liu, H.W. Natural [4 + 2]-cyclases. *Chem*  
35 *Rev* **117**, 5367-5388 (2017).
- 36 6. Jamieson, C.S., Ohashi, M., Liu, F., Tang, Y. & Houk, K.N. The expanding world of

- 1 biosynthetic pericyclases: cooperation of experiment and theory for discovery. *Nat Prod*  
2 *Rep* **36**, 698-713 (2019).
- 3 7. Lichman, B.R., O'Connor, S.E. & Kries, H. Biocatalytic strategies towards [4+2]  
4 cycloadditions. *Chemistry* **25**, 6864-6877 (2019).
- 5 8. Kato, N. et al. A new enzyme involved in the control of the stereochemistry in the decalin  
6 formation during equisetin biosynthesis. *Biochem Biophys Res Commun* **460**, 210-215  
7 (2015).
- 8 9. Kato, N. et al. Control of the stereochemical course of [4+2] cycloaddition during *trans*-  
9 decalin formation by Fsa2-family enzymes. *Angew Chem Int Ed Engl* **57**, 9754-9758  
10 (2018).
- 11 10. Dickschat, J.S. Isoprenoids in three-dimensional space: the stereochemistry of terpene  
12 biosynthesis. *Nat Prod Rep* **28**, 1917-1936 (2011).
- 13 11. Keatinge-Clay, A.T. Stereocontrol within polyketide assembly lines. *Nat Prod Rep* **33**, 141-  
14 149 (2016).
- 15 12. Weissman, K.J. Polyketide stereocontrol: a study in chemical biology. *Beilstein J Org*  
16 *Chem* **13**, 348-371 (2017).
- 17 13. Christianson, D.W. Structural and chemical biology of terpenoid cyclases. *Chem Rev* **117**,  
18 11570-11648 (2017).
- 19 14. Kim, H.J., Ruzsyczky, M.W., Choi, S.H., Liu, Y.N. & Liu, H.W. Enzyme-catalysed [4+2]  
20 cycloaddition is a key step in the biosynthesis of spinosyn A. *Nature* **473**, 109-112 (2011).
- 21 15. Fischbach, M.A. & Walsh, C.T. Assembly-line enzymology for polyketide and  
22 nonribosomal peptide antibiotics: logic, machinery, and mechanisms. *Chem Rev* **106**,  
23 3468-3496 (2006).
- 24 16. Fage, C.D. et al. The structure of SpnF, a standalone enzyme that catalyzes [4 + 2]  
25 cycloaddition. *Nat Chem Biol* **11**, 256-258 (2015).
- 26 17. Tian, Z. et al. An enzymatic [4+2] cyclization cascade creates the pentacyclic core of  
27 pyrroindomycins. *Nat Chem Biol* **11**, 259-265 (2015).
- 28 18. Zheng, Q. et al. Structural insights into a flavin-dependent [4 + 2] cyclase that catalyzes  
29 *trans*-decalin formation in pyrroindomycin biosynthesis. *Cell Chem Biol* **25**, 718-727 e3  
30 (2018).
- 31 19. Zheng, Q. et al. Enzyme-dependent [4 + 2] cycloaddition depends on lid-like interaction  
32 of the N-terminal sequence with the catalytic core in PyrI4. *Cell Chem Biol* **23**, 352-360  
33 (2016).
- 34 20. Yang, Z. et al. Influence of water and enzyme SpnF on the dynamics and energetics of  
35 the ambimodal [6+4]/[4+2] cycloaddition. *Proc Natl Acad Sci U S A* **115**, E848-E855  
36 (2018).

- 1 21. Dan, Q. et al. Fungal indole alkaloid biogenesis through evolution of a bifunctional  
2 reductase/Diels-Alderase. *Nat Chem* **11**, 972-980 (2019).
- 3 22. Zou, Y. et al. Computational investigation of the mechanism of Diels-Alderase PyrI4. *J*  
4 *Am Chem Soc* **142**, 20232-20239 (2020).
- 5 23. Schobert, R. & Schlenk, A. Tetramic and tetrionic acids: an update on new derivatives and  
6 biological aspects. *Bioorg Med Chem* **16**, 4203-4221 (2008).
- 7 24. Li, G., Kusari, S. & Spiteller, M. Natural products containing 'decalin' motif in  
8 microorganisms. *Nat Prod Rep* **31**, 1175-1201 (2014).
- 9 25. Burmeister, H.R., Bennett, G.A., Vesonder, R.F. & Hesseltine, C.W. Antibiotic produced  
10 by *Fusarium equiseti* NRRL 5537. *Antimicrob Agents Chemother* **5**, 634-639 (1974).
- 11 26. Singh, S.B. et al. Equisetin and a novel opposite stereochemical homolog phomasetin,  
12 two fungal metabolites as inhibitors of HIV-1 integrase. *Tetrahedron Lett* **39**, 2243-2246  
13 (1998).
- 14 27. Agatsuma, T. et al. UCS1025A and B, new antitumor antibiotics from the fungus  
15 *Acremonium* species. *Org Lett* **4**, 4387-4390 (2002).
- 16 28. Nakai, R. et al. Telomerase inhibitors identified by a forward chemical genetics approach  
17 using a yeast strain with shortened telomere length. *Chem Biol* **13**, 183-190 (2006).
- 18 29. Li, X., Zheng, Q., Yin, J., Liu, W. & Gao, S. Chemo-enzymatic synthesis of equisetin.  
19 *Chem Commun* **53**, 4695-4697 (2017).
- 20 30. Li, L. et al. Biochemical characterization of a eukaryotic decalin-forming Diels-Alderase.  
21 *J Am Chem Soc* **138**, 15837-15840 (2016).
- 22 31. Sato, M. et al. Involvement of lipocalin-like CghA in decalin-forming stereoselective  
23 intramolecular [4+2] cycloaddition. *Chembiochem* **16**, 2294-2298 (2015).
- 24 32. Li, L. et al. Genome mining and assembly-line biosynthesis of the UCS1025A  
25 pyrrolizidinone family of fungal alkaloids. *J Am Chem Soc* **140**, 2067-2071 (2018).
- 26 33. Tan, D. et al. Genome-mined Diels-Alderase catalyzes formation of the *cis*-  
27 octahydrodecalins of varicidin A and B. *J Am Chem Soc* **141**, 769-773 (2019).
- 28 34. Kamiya, M. & Sugita, Y. Flexible selection of the solute region in replica exchange with  
29 solute tempering: Application to protein-folding simulations. *J Chem Phys* **149**, 072304  
30 (2018).
- 31 35. Re, S., Oshima, H., Kasahara, K., Kamiya, M. & Sugita, Y. Encounter complexes and  
32 hidden poses of kinase-inhibitor binding on the free-energy landscape. *Proc Natl Acad*  
33 *Sci U S A* **116**, 18404-18409 (2019).
- 34 36. Niitsu, A., Re, S., Oshima, H., Kamiya, M. & Sugita, Y. De novo prediction of binders and  
35 nonbinders for T4 lysozyme by gREST simulations. *J Chem Inf Model* **59**, 3879-3888  
36 (2019).

- 1 37. Flower, D.R., North, A.C. & Sansom, C.E. The lipocalin protein family: structural and  
2 sequence overview. *Biochim Biophys Acta* **1482**, 9-24 (2000).
- 3 38. Wienken, C.J., Baaske, P., Rothbauer, U., Braun, D. & Duhr, S. Protein-binding assays in  
4 biological liquids using microscale thermophoresis. *Nat Commun* **1**, 100 (2010).
- 5 39. Sato, M. et al. Catalytic mechanism and endo-to-exo selectivity reversion of an octalin-  
6 forming natural Diels–Alderase. *Nat Catal* (2021).
- 7 40. Taylor, M.S. & Jacobsen, E.N. Asymmetric catalysis by chiral hydrogen-bond donors.  
8 *Angew Chem Int Ed Engl* **45**, 1520-1543 (2006).
- 9 41. Oikawa, H., Katayama, K., Suzuki, Y. & Ichihara, A. Enzymatic activity catalysing exo-  
10 selective Diels–Alder reaction in solanapyrone biosynthesis. *J Chem Soc, Chem*  
11 *Commun*, 1321-1322 (1995).
- 12 42. Ose, T. et al. Insight into a natural Diels-Alder reaction from the structure of  
13 macrophomate synthase. *Nature* **422**, 185-9 (2003).
- 14 43. Byrne, M.J. et al. The Catalytic mechanism of a natural Diels-Alderase revealed in  
15 molecular detail. *J Am Chem Soc* **138**, 6095-6098 (2016).
- 16 44. Cogan, D.P. et al. Structural insights into enzymatic [4+2] aza-cycloaddition in thiopeptide  
17 antibiotic biosynthesis. *Proc Natl Acad Sci U S A* **114**, 12928-12933 (2017).
- 18 45. Cai, Y. et al. Structural basis for stereoselective dehydration and hydrogen-bonding  
19 catalysis by the SAM-dependent pericyclase LepI. *Nat Chem* **11**, 812-820 (2019).
- 20 46. Gao, L. et al. FAD-dependent enzyme-catalysed intermolecular [4+2] cycloaddition in  
21 natural product biosynthesis. *Nat Chem* **12**, 620-628 (2020).
- 22 47. Little, R. et al. Unexpected enzyme-catalysed [4+2] cycloaddition and rearrangement in  
23 polyether antibiotic biosynthesis. *Nat Catal* **2**, 1045-1054 (2019).
- 24 48. Chiu, H.J. et al. Structure of the first representative of Pfam family PF09410 (DUF2006)  
25 reveals a structural signature of the calycin superfamily that suggests a role in lipid  
26 metabolism. *Acta Crystallogr F* **66**, 1153-1159 (2010).
- 27 49. Minami, A., Ugai, T., Ozaki, T. & Oikawa, H. Predicting the chemical space of fungal  
28 polyketides by phylogeny-based bioinformatics analysis of polyketide synthase-  
29 nonribosomal peptide synthetase and its modification enzymes. *Sci Rep* **10**, 13556  
30 (2020).
- 31 50. Jang, J.H. et al. Fusarisetin A, an acinar morphogenesis inhibitor from a soil fungus,  
32 *Fusarium* sp. FN080326. *J Am Chem Soc* **133**, 6865-6867 (2011).
- 33 51. Nogawa, T. et al. Wakodecalines A and B, new decaline metabolites isolated from a  
34 fungus *Pyrenochaetopsis* sp. RK10-F058. *J Antibiot* **71**, 123-128 (2018).
- 35 52. Kabsch, W. XDS. *Acta Crystallogr D* **66**, 125-132 (2010).
- 36 53. Evans, P.R. & Murshudov, G.N. How good are my data and what is the resolution? *Acta*

- 1            *Crystallogr D* **69**, 1204-1214 (2013).
- 2    54.    McCoy, A.J. et al. Phaser crystallographic software. *J Appl Crystallogr* **40**, 658-674 (2007).
- 3    55.    Emsley, P., Lohkamp, B., Scott, W.G. & Cowtan, K. Features and development of Coot.
- 4            *Acta Crystallogr D* **66**, 486-501 (2010).
- 5    56.    Murshudov, G.N. et al. REFMAC5 for the refinement of macromolecular crystal structures.
- 6            *Acta Crystallogr D* **67**, 355-367 (2011).
- 7    57.    Afonine, P.V. et al. Towards automated crystallographic structure refinement with
- 8            phenix.refine. *Acta Crystallogr D* **68**, 352-367 (2012).
- 9    58.    Williams, C.J. et al. MolProbity: More and better reference data for improved all-atom
- 10           structure validation. *Protein Sci* **27**, 293-315 (2018).
- 11    59.    Liebschner, D. et al. Polder maps: improving OMIT maps by excluding bulk solvent. *Acta*
- 12           *Crystallogr D* **73**, 148-157 (2017).
- 13    60.    Trott, O. & Olson, A.J. AutoDock Vina: improving the speed and accuracy of docking with
- 14           a new scoring function, efficient optimization, and multithreading. *J Comput Chem* **31**,
- 15           455-61 (2010).
- 16    61.    Jung, J. et al. GENESIS: a hybrid-parallel and multi-scale molecular dynamics simulator
- 17           with enhanced sampling algorithms for biomolecular and cellular simulations. *Wiley*
- 18           *Interdiscip Rev Comput Mol Sci* **5**, 310-323 (2015).
- 19    62.    Kobayashi, C. et al. GENESIS 1.1: A hybrid-parallel molecular dynamics simulator with
- 20           enhanced sampling algorithms on multiple computational platforms. *J Comput Chem* **38**,
- 21           2193-2206 (2017).
- 22    63.    Maier, J.A. et al. ff14SB: Improving the accuracy of protein side chain and backbone
- 23           parameters from ff99SB. *J Chem Theory Comput* **11**, 3696-3713 (2015).
- 24    64.    Jorgensen, W.L., Chandrasekhar, J., Madura, J.D., Impey, R.W. & Klein, M.L.
- 25           Comparison of simple potential functions for simulating liquid water. *J Chem Phys* **79**,
- 26           926-935 (1983).
- 27    65.    Wang, J., Wolf, R.M., Caldwell, J.W., Kollman, P.A. & Case, D.A. Development and
- 28           testing of a general amber force field. *J Comput Chem* **25**, 1157-1174 (2004).
- 29    66.    Case, D.A. et al. AMBER 2018. *University of California, San Francisco*. (2018).
- 30    67.    Frisch, M.J. et al. Gaussian 16 Rev. B.01. (Wallingford, CT, 2016).
- 31    68.    Zhao, Y. & Truhlar, D.G. The M06 suite of density functionals for main group
- 32           thermochemistry, thermochemical kinetics, noncovalent interactions, excited states, and
- 33           transition elements: two new functionals and systematic testing of four M06-class
- 34           functionals and 12 other functionals. *Theor Chem Account* **120**, 215-241 (2008).
- 35    69.    Frisch, M.J., Pople, J.A. & Binkley, J.S. Self-consistent molecular orbital methods 25.
- 36           Supplementary functions for Gaussian basis sets. *J Chem Phys* **80**, 3265-3269 (1984).

- 1 70. Klamt, A. & Schuurmann, G. COSMO: a new approach to dielectric screening in solvents  
2 with explicit expressions for the screening energy and its gradient. *J Chem Soc, Perkin*  
3 *Trans 2*, 799-805 (1993).
- 4 71. Andzelm, J., Kölmel, C. & Klamt, A. Incorporation of solvent effects into density functional  
5 calculations of molecular energies and geometries. *J Chem Phys* **103**, 9312-9320 (1995).
- 6 72. Barone, V. & Cossi, M. Quantum Calculation of Molecular Energies and Energy Gradients  
7 in Solution by a Conductor Solvent Model. *J Phys Chem A* **102**, 1995-2001 (1998).
- 8 73. Cossi, M., Rega, N., Scalmani, G. & Barone, V. Energies, structures, and electronic  
9 properties of molecules in solution with the C-PCM solvation model. *J Comput Chem* **24**,  
10 669-681 (2003).
- 11 74. Ishida, K., Morokuma, K. & Komornicki, A. The intrinsic reaction coordinate. An *ab initio*  
12 calculation for  $\text{HNC} \rightarrow \text{HCN}$  and  $\text{H}^- + \text{CH}_4 \rightarrow \text{CH}_3 + \text{H}^-$ . *J Chem Phys* **66**, 2153-2156 (1977).
- 13 75. Fukui, K. The path of chemical reactions - the IRC approach. *Acc Chem Res* **14**, 363-368  
14 (1981).

15  
16

## 17 **Acknowledgements**

18 We acknowledge the computational resources provided by the RIKEN Advanced Center  
19 for Computing and Communication (HOKUSAI GreatWave and BigWaterfall) and the HPCI  
20 system (Project ID: hp200153) for the MD simulations and the Research Center for  
21 Computational Science (Okazaki, Japan) for the DFT calculations. This work was supported  
22 by MEXT/KAKENHI (Grant Numbers 19H04665, 20K05872 (to NK), 19K12229 (to SR),  
23 19K06992 (to RT), 20K15273 (to KW), 19H05645 (to YS), 20H00416 (ST), 19H04658,  
24 19H05780 (to SN)), MEXT as "Priority Issue on Post-K computer" (Building Innovative Drug  
25 Discovery Infrastructure Through Functional Control of Biomolecular Systems), the Takeda  
26 Science Foundation (to RT), and the Naito Foundation (to RT), and RIKEN Pioneering  
27 Research Projects (Dynamic Structural Biology/Glycolipidologue Initiative) (to YS).

28

## 29 **Author contributions**

30 N.K., S.T., and S.N. designed the research. K.F., K.K., and T.H. performed enzyme  
31 purification and crystallography. Docking simulations were done by K.F. S.R. and Y.S.  
32 performed MD simulations. Site-directed mutagenesis and analysis of mutants were done by  
33 K.F., N.K., K.K., and T.N. Compound isolation and characterization were done by T.N. K.W.  
34 and R.T. performed DFT calculations. N.K., K.F., T.H., K.W., R.T., S.R., and S.N. wrote the  
35 manuscript. All authors discussed the data.

36

1 **Competing interests**

2 The authors declare no competing interests.

3

4



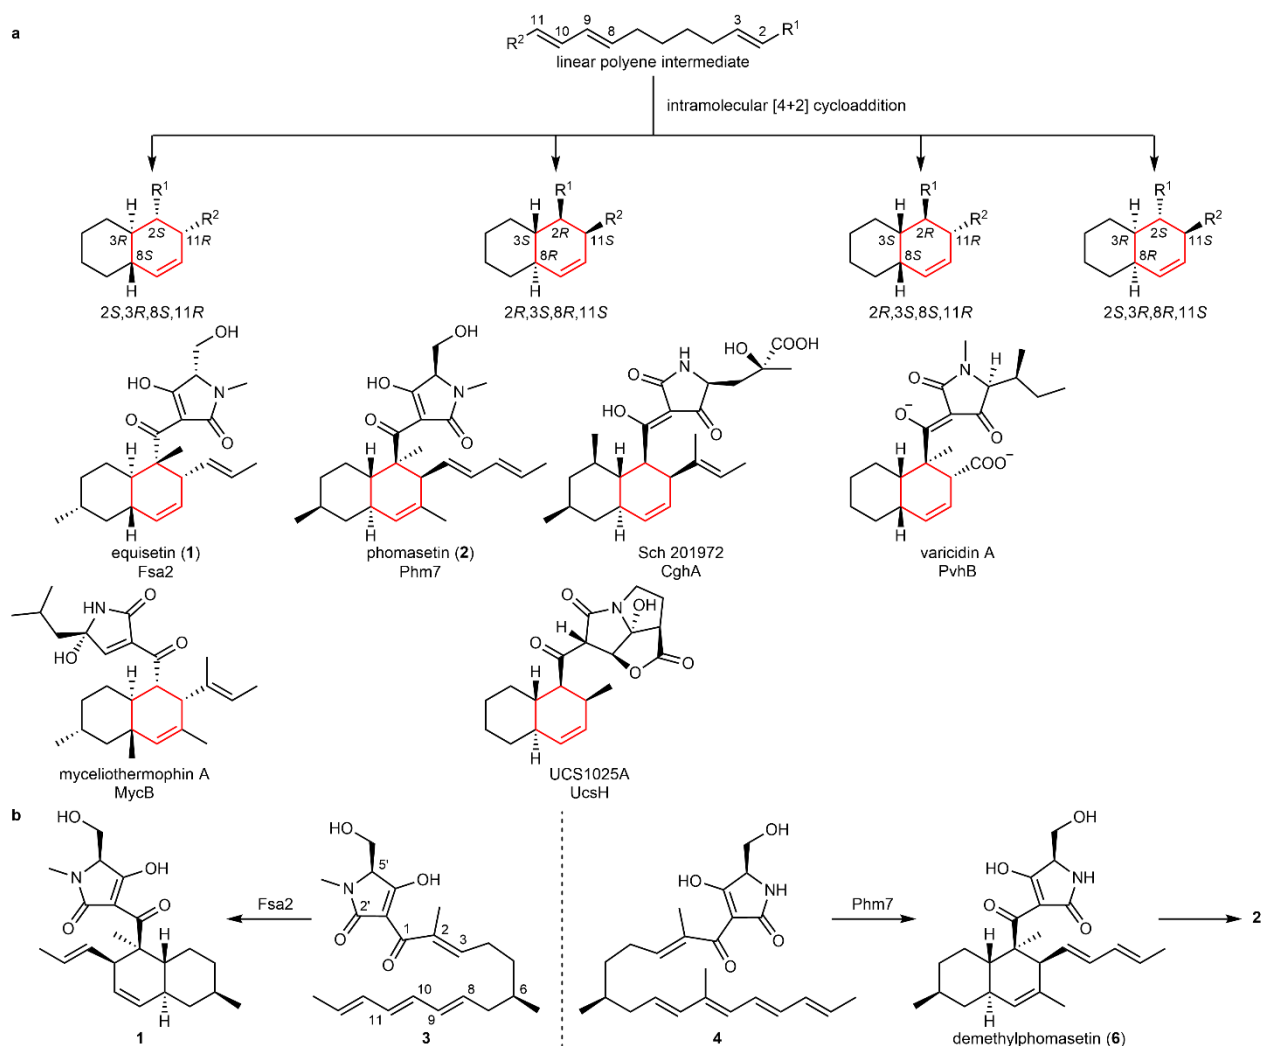

**Fig. 1: The Fsa2-family decalin synthases (DSs) catalysing stereoselective Diels-Alder (DA) reaction. a**, Four possible configurations of decalin formed via intramolecular DA reaction, and corresponding Fsa2-family DSs. **b**, The reactions catalysed by Fsa2 and Phm7 to form enantiomeric decalin scaffolds. Linear tetraenoyl tetramic acid **3** was chemically synthesized and confirmed to be a Fsa2 substrate to form **1**<sup>29</sup>, whereas pentaenoyl tetramic acid **4** is a likely Phm7 substrate to yield *N*-demethylphomasetin (**6**), which is further converted to **2**.

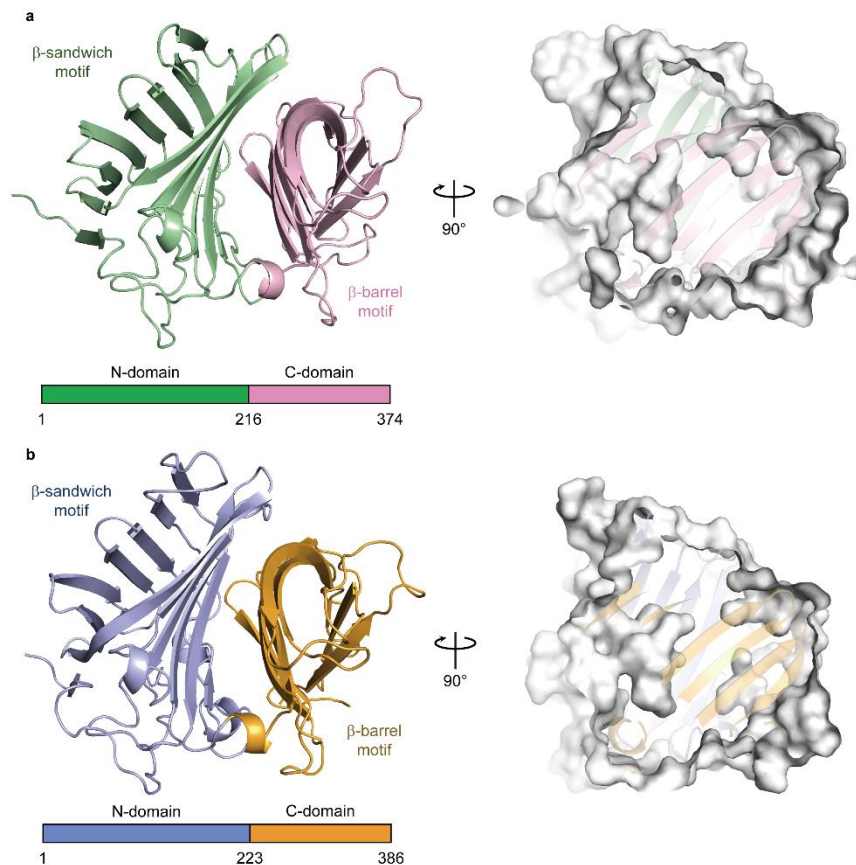

**Fig. 2: Crystal structures of Fsa2 and Phm7. a,b**, Overall structures of Fsa2 (**a**) and Phm7 (**b**). Both DSs consist of two domains: N-domains for residues 1–215 of Fsa2 and 1–222 of Phm7, and C-domains for residues 216–374 and 223–386. Surface models (right panels) show shapes of the pocket between the two domains of both enzymes.

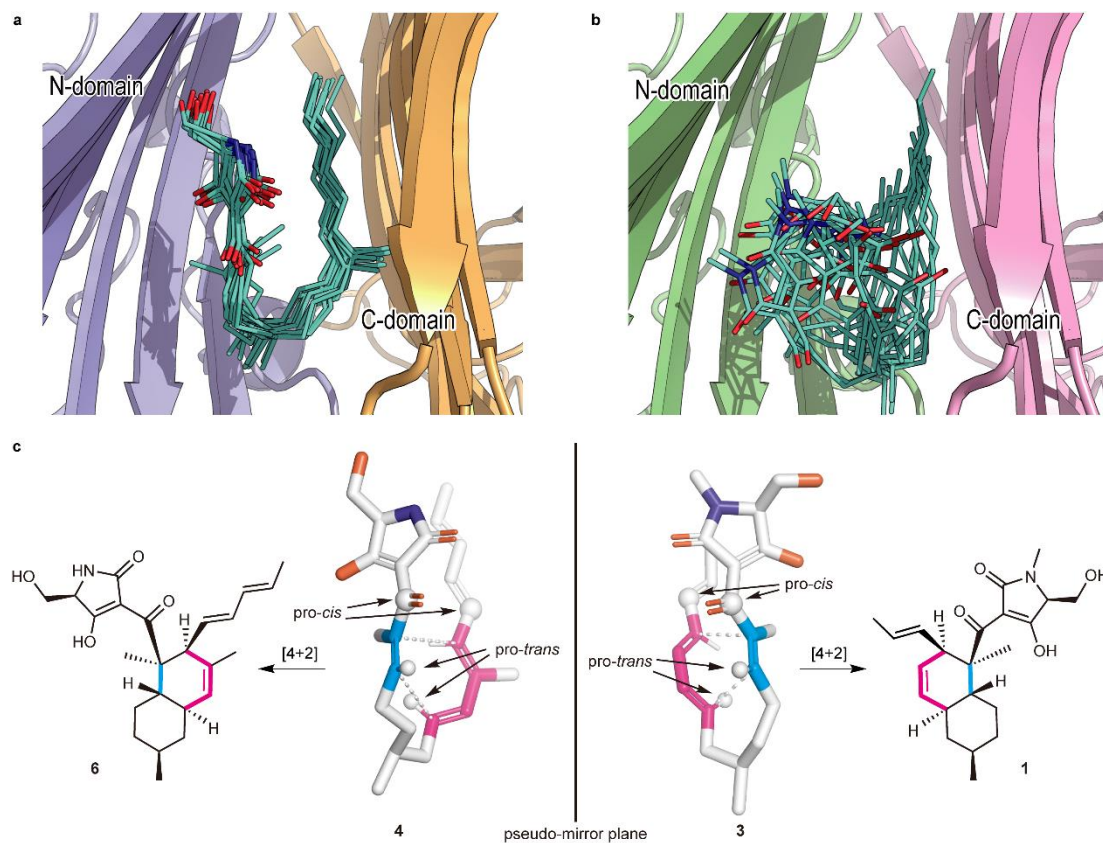

**Fig. 3: Predicted binding model.** **a, b,** A collective view of 12 representative snapshots taken from the top 70% of the main folded clusters (chosen based on the RMSD values from the cluster centre in ascending order) for Phm7 (**a**) and Fsa2 (**b**), respectively. **c,** Conformations of the representative poses of **4** (left) and **3** (right) in the pockets. The diene and dienophile moieties of the substrate are indicated in pink and cyan, respectively. The corresponding cycloadducts are also shown.

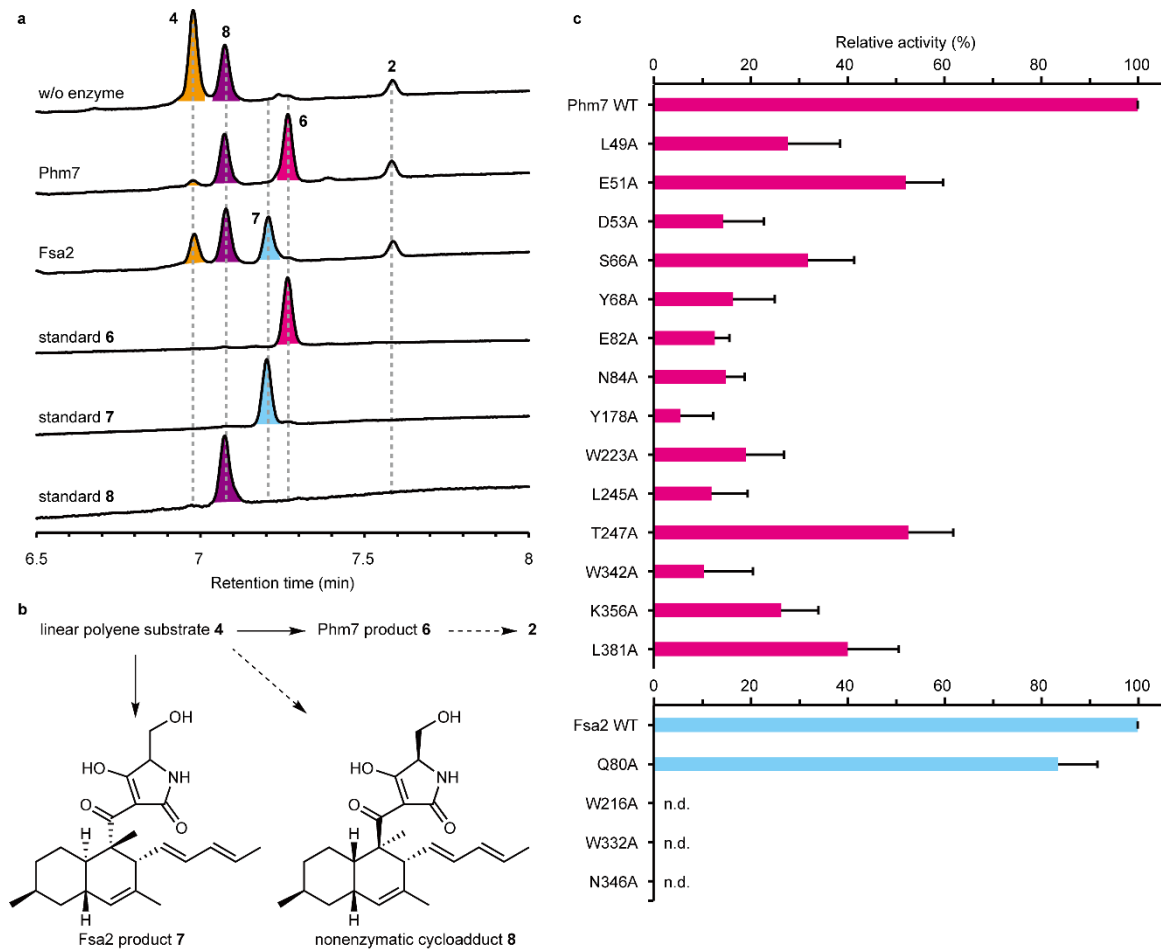

**Fig. 4: *In vitro* analysis of Ala-substituted Phm7 and Fsa2 mutants.** **a**, UPLC traces of the *in vitro* Phm7 and Fsa2 reaction products. The cell lysates prepared from the  $\Delta phm7$  mycelia were incubated with Phm7 and Fsa2 and analysed by LC/ESI-MS. **b**, Linear polyenyl tetramic acid **4** was converted into **6** and **7** by Phm7 and Fsa2, respectively. Conversions indicated by broken arrows were not detected under the conditions tested: non-enzymatic formation of **8** from **4** was not observed *in vitro*, and sinefungin added in the reaction buffer inhibited *N*-methylation of **6**. **c**, Comparison of the enzyme activities of the Ala-substituted mutants with those of the wild-type Phm7 and Fsa2. Data are the mean and error bars represent the standard deviation of four independent experiments. n.d., not detected.

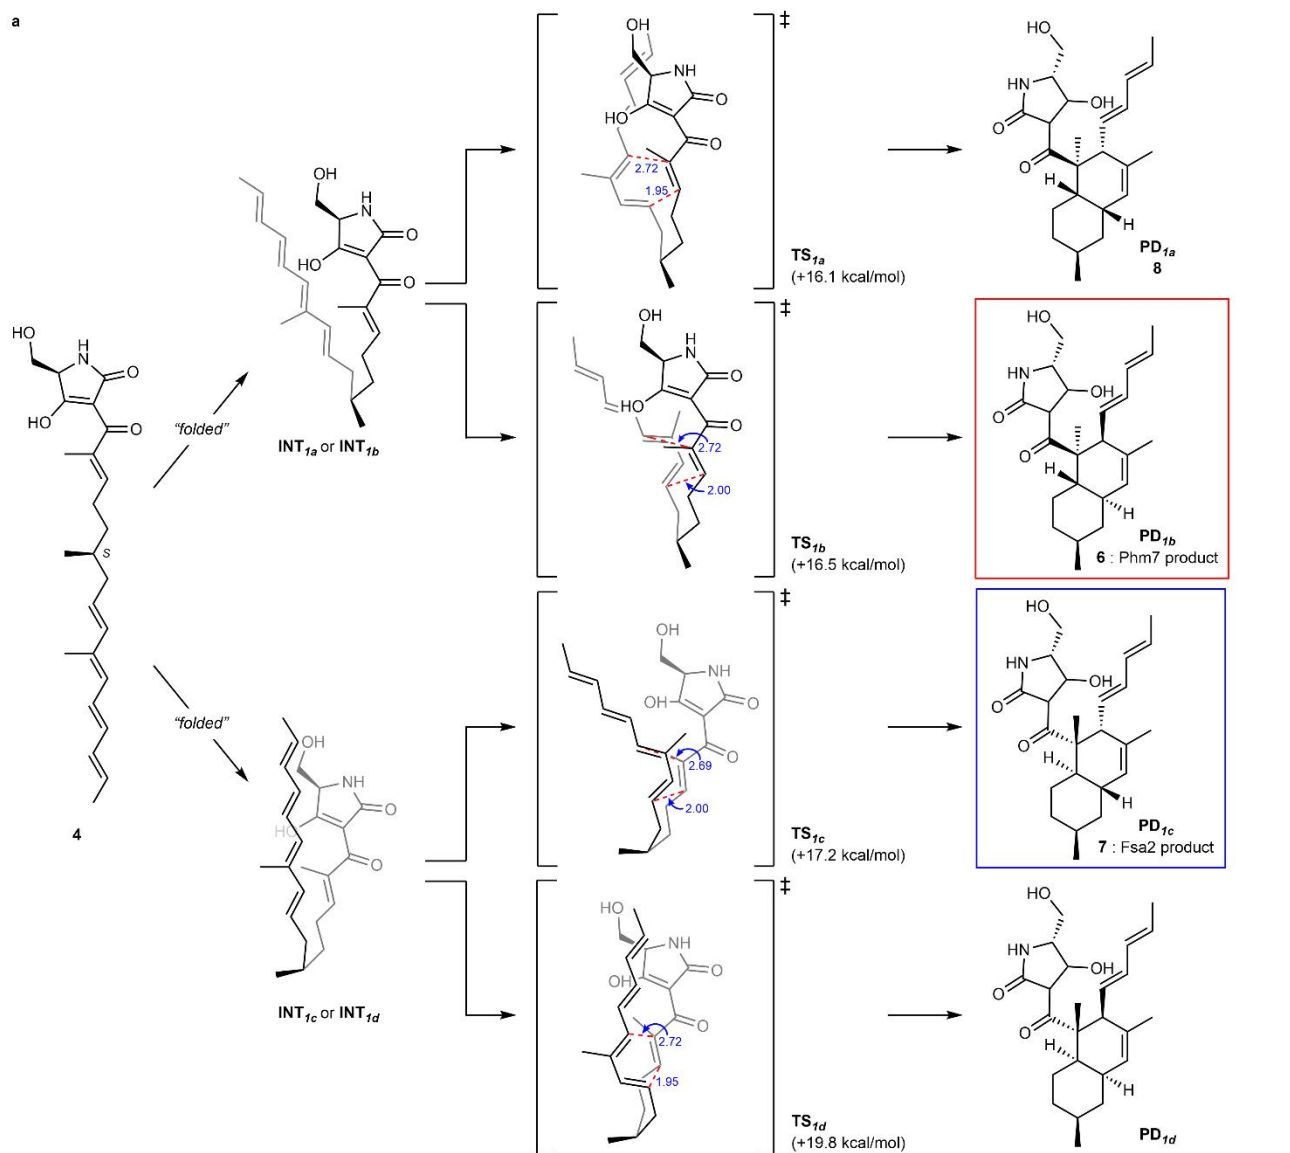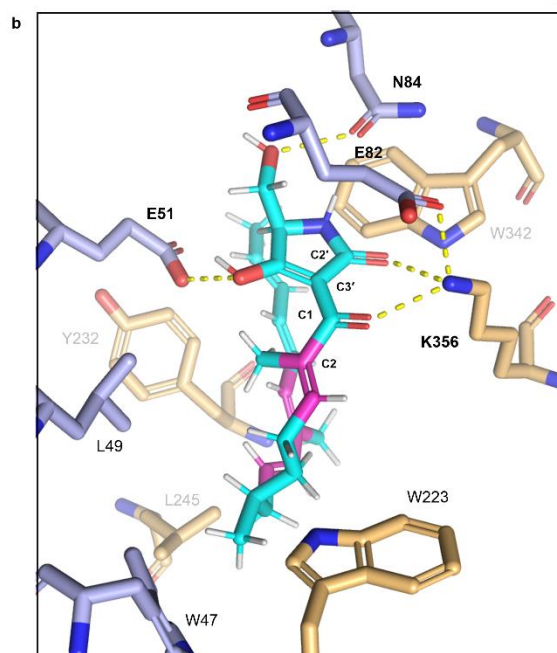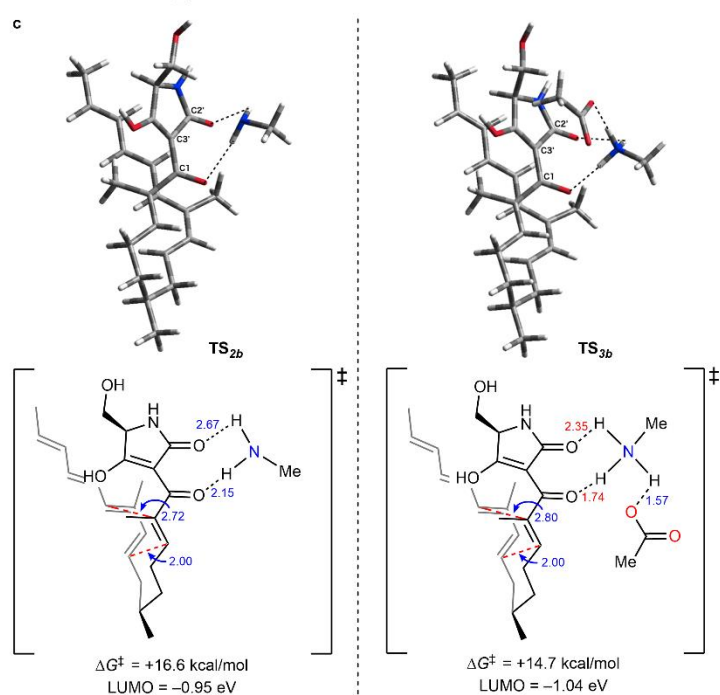

**Fig. 5: The DFT calculations for the reaction mechanism of the uncatalyzed and hydrogen bond-catalysed DA reaction of 4.** **a**, Reaction pathways for the uncatalyzed DA reaction of substrate **4** to produce four types of decalin stereoisomers. The energy changes and bond lengths were calculated at the M06-2X/6-311+G\*\* (scrf = CPCM, water) level of theory are shown in kcal/mol and Å, respectively. **b**, Illustration of the hydrogen bond network of **4** with amino acid residues in the Phm7 pocket obtained from the MD simulation (cf. Supplementary Fig. 14a). **c**, Transition state structures to give **6** with methylamine (**TS<sub>2b</sub>**) and both methylamine and acetic acid (**TS<sub>3b</sub>**) as models of the hydrogen bonding with K356 and E82 residues.

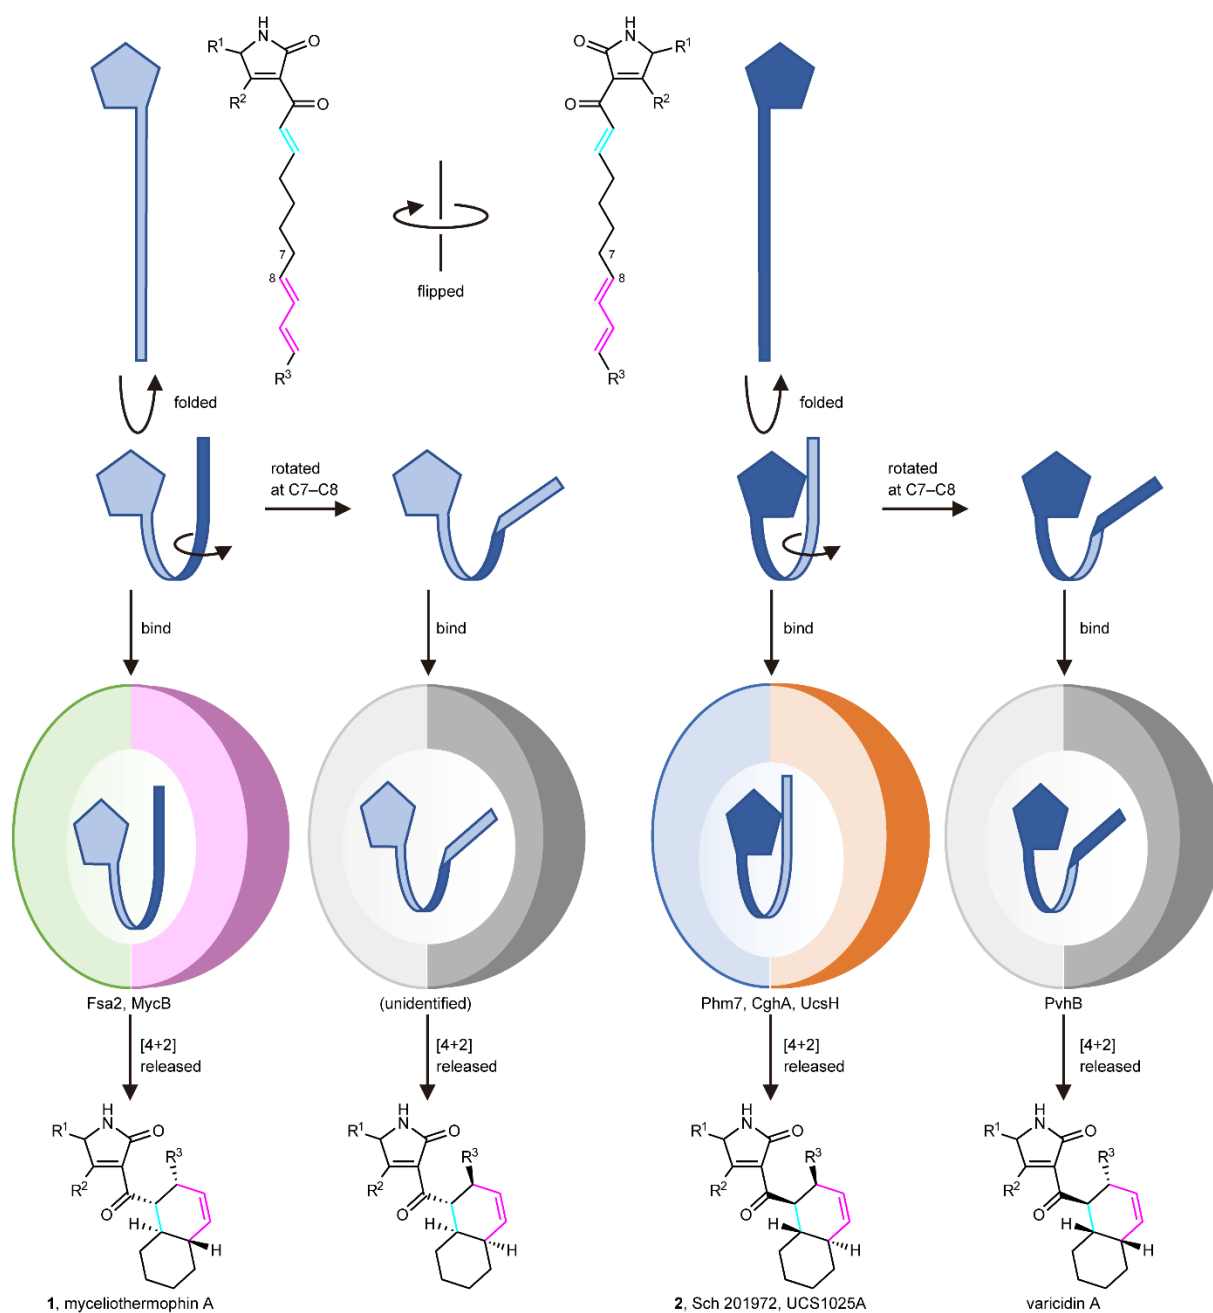

**Fig. 6: A model of the formation of four diastereomeric decalin scaffolds by decalin synthases.** Linear polyenoyl tetramic acid substrates are shown schematically as a pentagon and a ribbon. Folded substrates bind to corresponding DSs in the tetramic acid–front and polyene–back manner, and are preorganized in the pocket. The substrates only with productive conformations are selected and undergo the reaction to produce respective decalin scaffolds.
